# Supplementary material for: Synthesis of Biomimetic Melanin-Like Multifunctional Nanoparticles for pH Responsive Magnetic Resonance Imaging and Photothermal Therapy
Source: MDPI journal article supplement (doi:10.3390/nano11082107), 2021-08-19
Supplement: s1 [file s1]

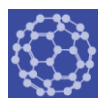

# Synthesis of Biomimetic Melanin-like Multifunctional Nanoparticles for pH Responsive Magnetic Resonance Imaging and Photothermal Therapy

Jing Qu <sup>1</sup>, Devin Guillory <sup>1</sup>, Pohlee Cheah <sup>1</sup>, Bin Tian <sup>1</sup>, Jie Zheng <sup>2</sup>, Yongjian Liu <sup>2</sup>, Courtney Cates <sup>3</sup>, Amol V. Janorkar <sup>3</sup> and Yongfeng Zhao <sup>1,\*</sup>

<sup>1</sup> Department of Chemistry, Physics and Atmospheric Science, Jackson State University, Jackson, MS 39217, USA; jing.qu@students.jsums.edu (J.Q.); dmguillory@yahoo.com (D.G.); pohlee.cheah@jsums.edu (P.C.); bin.tian@jsums.edu (B.T.); yongfeng.zhao@jsums.edu (Y.Z.)

<sup>2</sup> Mallinckrodt Institute of Radiology, Washington University School of Medicine, St. Louis, MO 63110, USA; zhengj@wustl.edu (J.Z.); yongjianliu@wustl.edu (Y.L.)

<sup>3</sup> Department of Biomedical Materials Science, School of Dentistry, University of Mississippi Medical Center, Jackson, MS 39216, USA; ccates@umc.edu (C.C.); ajanorkar@umc.edu (A.J.)

\* Correspondence: yongfeng.zhao@jsums.edu

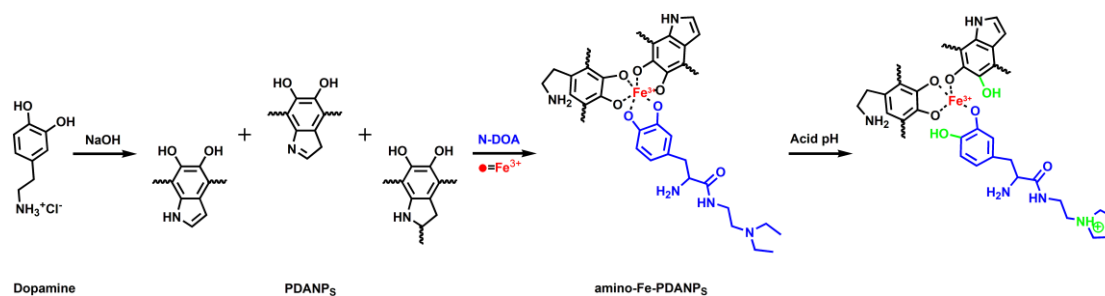

Figure S1. The possible chemical reactions in the synthesis of PDANPs and amino-Fe-PDANPs.

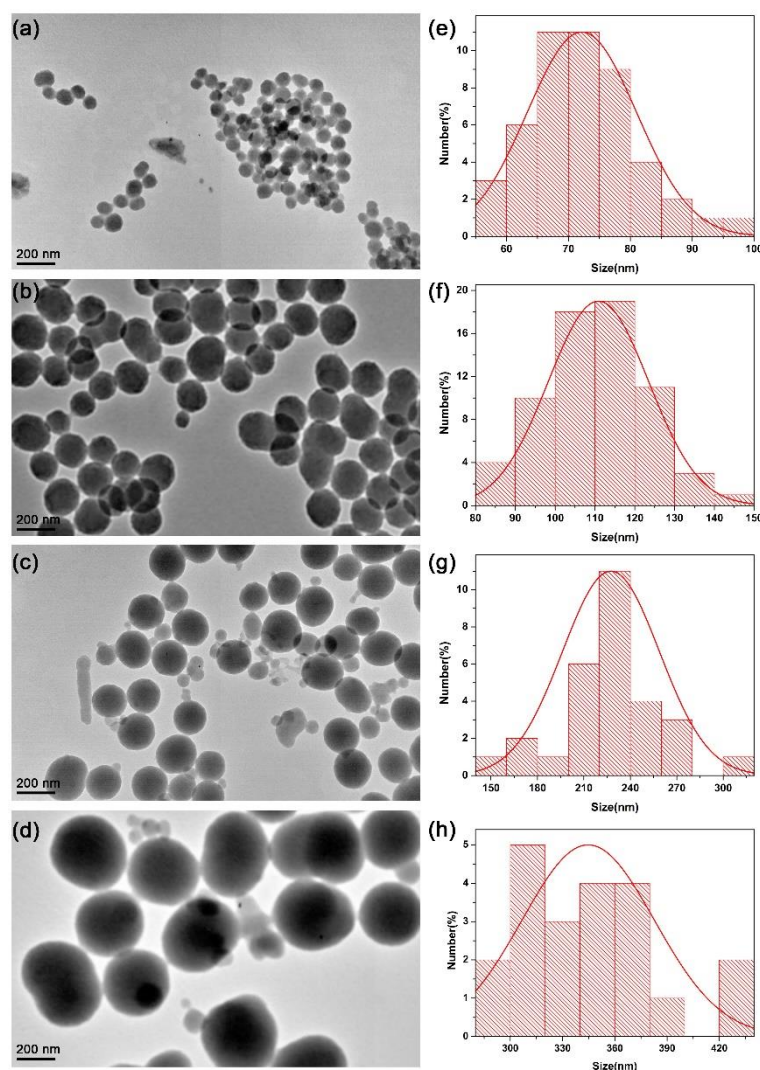

**Figure S2.** The TEM images of PDANPs synthesized using different amount of NaOH. The average size for each NaOH amount are (a) NaOH 45.5  $\mu\text{L}$ :  $72.2 \pm 8.8$  nm, (b) NaOH 38  $\mu\text{L}$ :  $110.9 \pm 12.6$  nm, (c) NaOH 32  $\mu\text{L}$ :  $227.5 \pm 31.3$  nm, and (d) NaOH 28  $\mu\text{L}$ :  $344.7 \pm 38.0$  nm. (e-h) are nanoparticle size distribution histogram corresponding to figure a-d, respectively.

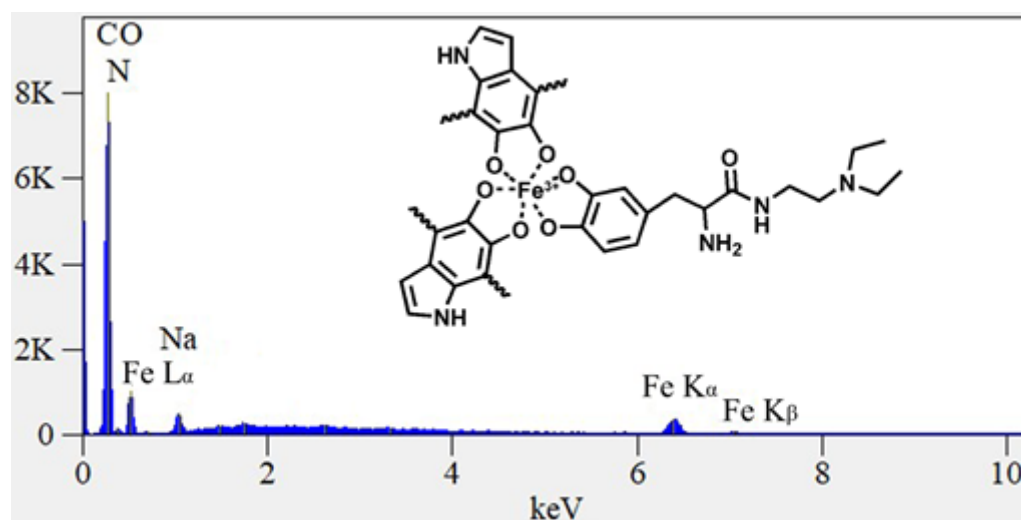

**Figure S3.** EDS of amino-Fe-PDANPs.

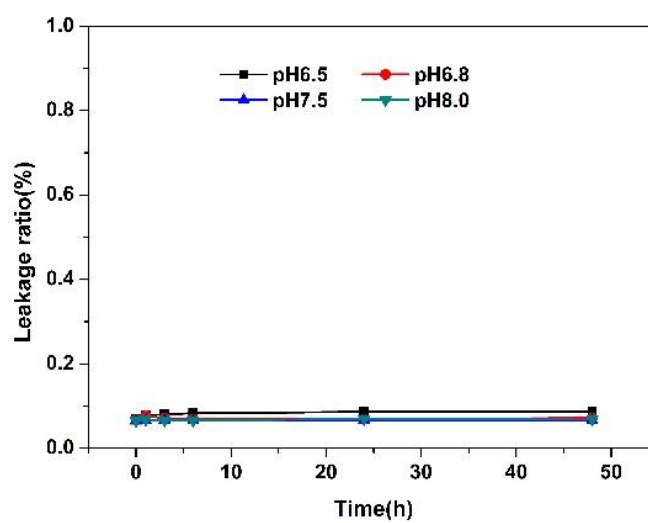

**Figure S4.** The iron percentage leaking out of the nanoparticles at various pHs.

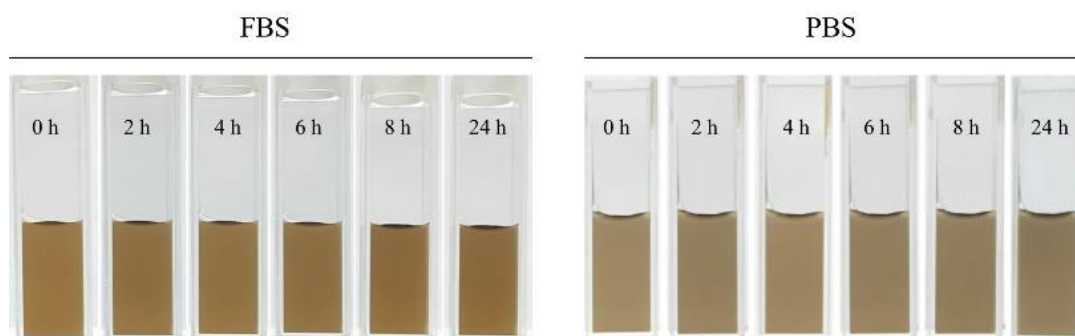

**Figure S5.** Photographs of amino-Fe-PDANPs after incubation with FBS and PBS for 24 h.
